# Supplementary material for: The Orthology Clause in the Next Generation Sequencing Era: Novel Reference Genes Identified by RNA-seq in Humans Improve Normalization of Neonatal Equine Ovary RT-qPCR Data
Source: PLoS One. 2015 Nov 4;10(11):e0142122. doi: 10.1371/journal.pone.0142122 (PMC4633174; doi:10.1371/journal.pone.0142122)
Supplement: S3 File — (XLSX) [file pone.0142122.s003.xlsx]

## Sheet: Tabelle1
File S3. Estimated transcript abundance of all reference gene candidates
	Efficiency-corrected Cq value of
Sample	ACTB	C5H1orf43	GAPDH	B2M	CHMP2A	GPI	OAZ1	PSMB2	PSMB4	RAB7A	REEP5	RPS29	SNRPD3	VCP	VPS29	UBB	EMC7	ERE-B
F1	16.88	24.09	22.49	19.11	22.07	23.42	23.5	24.63	25.56	28.41	23.06	20.92	25.27	21.99	24.77	17.61	26.83	18.95
F2	18.18	25.42	22.41	19.21	22.45	23.6	24.96	25.53	25.78	27.74	23.52	19.84	25.85	22.51	24.95	18.85	26.79	19.72
F3	17.09	24.75	22.7	19.76	22.52	23.62	24.98	25.91	26.69	28.45	23.6	21.2	25.9	22.53	25.25	18.59	27.51	19.01
F4	15.96	22.6	20.3	19.57	20.26	21.47	22.21	22.22	23.7	25.82	21.62	19.58	23.97	20.35	22.88	16.52	24.02	19.29
F5	16.53	24.45	22.3	19.83	22.19	23.82	23.85	24.89	25.72	28.44	22.86	21.37	25.33	21.74	24.94	17.41	27.17	19.36
F6	17.12	23.92	23.01	21.26	23.33	24.08	23.38	25.37	25.98	29.38	24.62	20.5	26.63	23.23	26.23	19.42	28.02	19.52
F7	16.04	23.2	22.17	20.09	21.33	23.33	22.45	24.54	25.08	27.75	22.54	20.42	25.32	21.57	24.58	17.63	26.43	19.54
Transcript abundance level	medium-high	medium	medium	medium-high	medium	medium	medium	medium	low-medium	low-medium	medium	medium	low-medium	medium	medium	medium-high	low-medium	medium-high
Transcript abundance level: high (< 15), medium-high (15 to 20), medium (20 to 25), low-medium (25 to 30), low (> 30)
