# Supplementary material for: The Orthology Clause in the Next Generation Sequencing Era: Novel Reference Genes Identified by RNA-seq in Humans Improve Normalization of Neonatal Equine Ovary RT-qPCR Data
Source: PLoS One. 2015 Nov 4;10(11):e0142122. doi: 10.1371/journal.pone.0142122 (PMC4633174; doi:10.1371/journal.pone.0142122)
Supplement: S6 File — (XLSX) [file pone.0142122.s006.xlsx]

## Sheet: Tabelle1
Gene1		Gene2		MR*	Cor*	Coexpression
Symbol	Entrez Gene ID*	Symbol	Entrez Gene ID*			detail
PSMB2	5690	SNRPD3	6634	10.5	0.53	detail
GAPDH	2597	OAZ1	4946	17.8	0.50	detail
C1orf43	25912	PSMB4	5692	37.8	0.51	detail
C1orf43	25912	OAZ1	4946	40.4	0.51	detail
EMC7	56851	REEP5	7905	44.0	0.41	detail
PSMB2	5690	PSMB4	5692	45.9	0.48	detail
EMC7	56851	RAB7A	7879	50.6	0.42	detail
CHMP2A	27243	OAZ1	4946	64.3	0.41	detail
OAZ1	4946	VCP	7415	86.6	0.43	detail
GAPDH	2597	PSMB2	5690	92.0	0.44	detail
OAZ1	4946	B2M	567	113.4	0.39	detail
ACTB	60	RAB7A	7879	120.0	0.34	detail
GAPDH	2597	VCP	7415	120.0	0.40	detail
OAZ1	4946	ACTB	60	121.8	0.35	detail
GAPDH	2597	PSMB4	5692	128.1	0.41	detail
OAZ1	4946	PSMB4	5692	137.2	0.42	detail
OAZ1	4946	REEP5	7905	144.2	0.37	detail
PSMB2	5690	VCP	7415	149.0	0.42	detail
C1orf43	25912	EMC7	56851	167.0	0.42	detail
CHMP2A	27243	EMC7	56851	194.8	0.35	detail
CHMP2A	27243	PSMB4	5692	200.6	0.37	detail
PSMB4	5692	SNRPD3	6634	215.2	0.42	detail
GAPDH	2597	ACTB	60	229.7	0.31	detail
VPS29	51699	PSMB4	5692	232.1	0.40	detail
CHMP2A	27243	REEP5	7905	233.9	0.33	detail
C1orf43	25912	GAPDH	2597	270.5	0.39	detail
VPS29	51699	REEP5	7905	289.0	0.35	detail
VPS29	51699	SNRPD3	6634	302.5	0.39	detail
VPS29	51699	EMC7	56851	318.2	0.36	detail
ACTB	60	VCP	7415	339.8	0.29	detail
CHMP2A	27243	VCP	7415	375.8	0.32	detail
C1orf43	25912	REEP5	7905	384.0	0.35	detail
PSMB4	5692	VCP	7415	410.1	0.36	detail
B2M	567	REEP5	7905	421.5	0.31	detail
B2M	567	EMC7	56851	435.6	0.32	detail
GAPDH	2597	CHMP2A	27243	470.5	0.30	detail
VPS29	51699	PSMB2	5690	477.0	0.37	detail
EMC7	56851	PSMB4	5692	488.6	0.35	detail
OAZ1	4946	PSMB2	5690	490.0	0.36	detail
OAZ1	4946	VPS29	51699	505.7	0.34	detail
PSMB4	5692	RPS29	6235	511.3	0.32	detail
CHMP2A	27243	VPS29	51699	535.7	0.31	detail
C1orf43	25912	VCP	7415	641.5	0.34	detail
C1orf43	25912	VPS29	51699	651.9	0.35	detail
GAPDH	2597	SNRPD3	6634	694.0	0.32	detail
VPS29	51699	B2M	567	695.8	0.30	detail
PSMB2	5690	ACTB	60	708.3	0.26	detail
SNRPD3	6634	VCP	7415	716.7	0.33	detail
B2M	567	ACTB	60	755.9	0.23	detail
C1orf43	25912	B2M	567	865.7	0.30	detail
OAZ1	4946	RAB7A	7879	867.3	0.29	detail
RAB7A	7879	REEP5	7905	877.6	0.28	detail
C1orf43	25912	CHMP2A	27243	885.9	0.29	detail
EMC7	56851	PSMB2	5690	886.0	0.31	detail
RPS29	6235	SNRPD3	6634	891.9	0.27	detail
PSMB4	5692	RAB7A	7879	931.6	0.30	detail
C1orf43	25912	RPS29	6235	946.1	0.27	detail
GAPDH	2597	EMC7	56851	949.6	0.28	detail
PSMB2	5690	REEP5	7905	976.5	0.29	detail
OAZ1	4946	SNRPD3	6634	1032.1	0.30	detail
PSMB4	5692	REEP5	7905	1051.3	0.28	detail
GAPDH	2597	REEP5	7905	1070.2	0.26	detail
CHMP2A	27243	B2M	567	1078.8	0.24	detail
C1orf43	25912	PSMB2	5690	1083.7	0.33	detail
VCP	7415	REEP5	7905	1090.6	0.27	detail
VPS29	51699	RPS29	6235	1093.4	0.25	detail
CHMP2A	27243	PSMB2	5690	1106.1	0.27	detail
CHMP2A	27243	SNRPD3	6634	1155.5	0.26	detail
EMC7	56851	VCP	7415	1198.3	0.27	detail
OAZ1	4946	EMC7	56851	1292.5	0.26	detail
CHMP2A	27243	RAB7A	7879	1303.2	0.24	detail
B2M	567	RPS29	6235	1365.3	0.20	detail
GAPDH	2597	VPS29	51699	1378.4	0.26	detail
EMC7	56851	RPS29	6235	1464.9	0.21	detail
OAZ1	4946	RPS29	6235	1471.2	0.21	detail
C1orf43	25912	RAB7A	7879	1559.5	0.27	detail
B2M	567	PSMB4	5692	1656.7	0.24	detail
GAPDH	2597	RAB7A	7879	1714.2	0.24	detail
CHMP2A	27243	ACTB	60	1786.2	0.17	detail
EMC7	56851	SNRPD3	6634	1843.0	0.25	detail
B2M	567	RAB7A	7879	1912.3	0.22	detail
VPS29	51699	VCP	7415	1995.0	0.24	detail
C1orf43	25912	SNRPD3	6634	2016.3	0.27	detail
ACTB	60	SNRPD3	6634	2155.7	0.18	detail
VCP	7415	RAB7A	7879	2202.7	0.22	detail
GAPDH	2597	B2M	567	2421.2	0.19	detail
PSMB4	5692	ACTB	60	2539.6	0.17	detail
PSMB2	5690	RAB7A	7879	2627.2	0.22	detail
B2M	567	VCP	7415	2637.8	0.19	detail
VPS29	51699	ACTB	60	2763.3	0.16	detail
VPS29	51699	RAB7A	7879	2920.1	0.21	detail
B2M	567	PSMB2	5690	3117.5	0.18	detail
EMC7	56851	ACTB	60	3122.6	0.14	detail
SNRPD3	6634	REEP5	7905	3157.8	0.19	detail
GAPDH	2597	RPS29	6235	3211.5	0.13	detail
ACTB	60	REEP5	7905	3323.6	0.14	detail
CHMP2A	27243	RPS29	6235	3328.2	0.12	detail
C1orf43	25912	ACTB	60	3602.4	0.14	detail
RPS29	6235	REEP5	7905	3731.0	0.13	detail
PSMB2	5690	RPS29	6235	3752.9	0.14	detail
SNRPD3	6634	RAB7A	7879	4066.2	0.18	detail
B2M	567	SNRPD3	6634	5558.0	0.10	detail
ACTB	60	RPS29	6235	5886.9	0.06	detail
RPS29	6235	VCP	7415	7140.4	0.06	detail
RPS29	6235	RAB7A	7879	7745.7	0.08	detail
MR: mutual rank
Cor: Pearson’s correlation coefficient
